# Supplementary material for: Microgravity-Induced Transcriptome Adaptation in Mouse Paraspinal longissimus dorsi Muscle Highlights Insulin Resistance-Linked Genes
Source: Front Physiol. 2017 May 5;8:279. doi: 10.3389/fphys.2017.00279 (PMC5418220; doi:10.3389/fphys.2017.00279)
Supplement: Table S2 — Microgravity-induced gene expression changes in the tongue muscle of space -flown vs. ground control mice. List of genes differentially regulated in the tongue muscle (internal reference control) of BF vs. BG mice, meeting FDR < 0.05 and fold change < −2 and > +2 criteria. The comparisons between all the three experimental groups are shown. [file Table2.XLSX]

## Sheet: TAN_BF vs. BG_FDR05_Fc2_27genes
					BF vs. BG		FC vs. BG		BF vs. FC
	Probeset ID	Entrez Gene	Gene Symbol	Gene Title	p-value	Fold-Change	p-value	Fold-Change	p-value	Fold-Change
	1419513_a_at	13605	Ect2	ect2 oncogene	3.64403e-05	-4.16959	0.000188226	-3.92834	0.838771	-1.06141
	1450920_at	12442	Ccnb2	cyclin B2	3.26276e-06	-3.67404	5.19978e-06	-4.06215	0.646149	1.10564
	1450842_a_at	12615	Cenpa	centromere protein A	2.71565e-05	-3.34031	0.000201582	-3.06007	0.716634	-1.09158
	1424278_a_at	11799	Birc5	baculoviral IAP repeat-containing 5	9.32278e-05	-3.05017	0.0271245	-1.81077	0.0486954	-1.68445
	1416118_at	66949	Trim59	tripartite motif-containing 59	1.50824e-06	-2.59745	0.000100491	-2.11303	0.182186	-1.22925
	1452954_at	68612	Ube2c	ubiquitin-conjugating enzyme E2C	8.79256e-05	-2.52243	3.66444e-05	-3.0669	0.348258	1.21585
	1439377_x_at	107995	Cdc20	cell division cycle 20	0.000114216	-2.50196	0.00207001	-2.11135	0.421072	-1.18501
	1437611_x_at	73804	Kif2c	kinesin family member 2C	7.81219e-05	-2.4201	7.76397e-05	-2.68774	0.59082	1.11059
	1418334_at	27214	Dbf4	DBF4 homolog (S. cerevisiae)	1.15292e-06	-2.36257	0.000958534	-1.68499	0.0194178	-1.40213
	1422814_at	12316	Aspm	asp (abnormal spindle)-like, microcephaly associated (Drosophila)	0.000222746	-2.2929	6.98227e-05	-2.82291	0.310517	1.23115
	1423227_at	16667	Krt17	keratin 17	1.29045e-06	-2.27301	0.000557302	-1.70616	0.036199	-1.33224
	1416558_at	17279	Melk	maternal embryonic leucine zipper kinase	0.000118835	-2.26412	0.000322061	-2.28643	0.958158	1.00985
	1433928_a_at	22121	Rpl13a	ribosomal protein L13A	9.97736e-05	-2.2426	0.0119514	-1.65474	0.107661	-1.35526
	1417797_a_at	69073	Kdf1	keratinocyte differentiation factor 1	0.000203647	-2.20879	0.832322	-1.04131	0.0009392	-2.12117
	1433568_at	100715	Papd4	PAP associated domain containing 4	7.83652e-05	-2.1827	0.0649477	-1.39609	0.0170956	-1.56344
	1455431_at	20537	Slc5a1	solute carrier family 5 (sodium/glucose cotransporter), member 1	9.47452e-05	-2.17298	0.152712	-1.29205	0.0074375	-1.6818
	1426817_at	17345	Mki67	antigen identified by monoclonal antibody Ki 67	0.00022064	-2.06137	0.0186241	-1.56941	0.133946	-1.31347
	1417910_at	12428	Ccna2	cyclin A2	0.000151239	-2.05382	0.0175059	-1.54785	0.10667	-1.32689
	1449405_at	21961	Tns1	tensin 1	8.84101e-05	2.06033	0.0141642	1.54164	0.0846606	1.33645
	1450093_s_at	16969	Zbtb7a	zinc finger and BTB domain containing 7a	0.000164181	2.14565	0.000327523	2.21642	0.85713	-1.03298
	1422230_s_at	13086 /// 13087	Cyp2a4 /// Cyp2a5	cytochrome P450, family 2, subfamily a, polypeptide 4 /// cytochrome P450, family 2, su	1.04831e-05	2.24325	0.00116157	1.77061	0.125051	1.26694
	1435026_at	94214	Spock2	sparc/osteonectin, cwcv and kazal-like domains proteoglycan 2	5.3515e-05	2.30136	0.0120853	1.63167	0.065013	1.41043
	1431697_at	20975	Synj2	synaptojanin 2	8.85466e-05	2.36336	0.720409	1.07099	0.000602193	2.2067
	1450661_x_at	18029	Nfic	nuclear factor I/C	3.05374e-05	2.39646	0.000240535	2.23542	0.694019	1.07204
	1422209_s_at	16705 /// 432600 /// 670533 /// 100415785	Gm11559 /// Gm11567 /// Gm11568 /// Krtap9-1	predicted gene 11559 /// predicted gene 11567 /// predicted gene 11568 /// keratin asso	1.49253e-05	2.72475	0.00071831	2.16359	0.235277	1.25937
	1427665_a_at	18029	Nfic	nuclear factor I/C	0.000165957	2.91043	0.00932292	2.07302	0.190273	1.40395
	1422565_s_at	18029	Nfic	nuclear factor I/C	3.40082e-05	3.58656	0.272915	1.33721	0.00129196	2.68212
